# Supplementary material for: First Insights into the Antiviral Activity of Chitosan-Based Bioactive Polymers towards the Bacteriophage Phi6: Physicochemical Characterization, Inactivation Potential, and Inhibitory Mechanisms
Source: MDPI journal article supplement (doi:10.3390/polym14163357), 2022-08-17
Supplement: s1 [file s1]

# Supplementary Materials

## 1. Minimum inhibitory concentration (MIC) of the test agents on bacteria

Minimum inhibitory concentration (MIC) of the test agents, e.g., LMW Ch, quart-LMW Ch, or HMW Ch, was determined in liquid medium for *Pseudomonas syringae* (Tables S1,2).

**Table S1.** Minimum inhibitory concentration (MIC) for bacteria. The pH values represent the values of the test agents prior to the addition of the bacterial culture.

| Test agent                    | MIC                |
|-------------------------------|--------------------|
|                               | <i>P. syringae</i> |
| LMW Ch (10 mg/L), pH = 4      | 1:80               |
| Quart-LMW Ch (5 mg/L), pH = 5 | > 1:20             |
| HMW Ch (10 mg/L), pH = 4      | 1:20               |

**Table S2.** Determination of minimum inhibitory concentration for *P.syringae*; ++ good bacterial growth; + partial inhibition of bacterial growth; +/- strong inhibition of bacteria growth, - no bacterial growth.

| Sample Dilution                 |              | Undiluted | 1:2  | 1:4  | 1:8   | 1:16  | 1:32  |
|---------------------------------|--------------|-----------|------|------|-------|-------|-------|
| Final Dilution in the Test Tube |              | 1:20      | 1:40 | 1:80 | 1:160 | 1:320 | 1:640 |
| Test agent                      | LMW Ch       | –         | –    | –    | +     | ++    | ++    |
|                                 | quart-LMW Ch | ++        | ++   | ++   | ++    | ++    | ++    |
|                                 | HMW Ch       | –         | –/+  | +    | ++    | ++    | ++    |

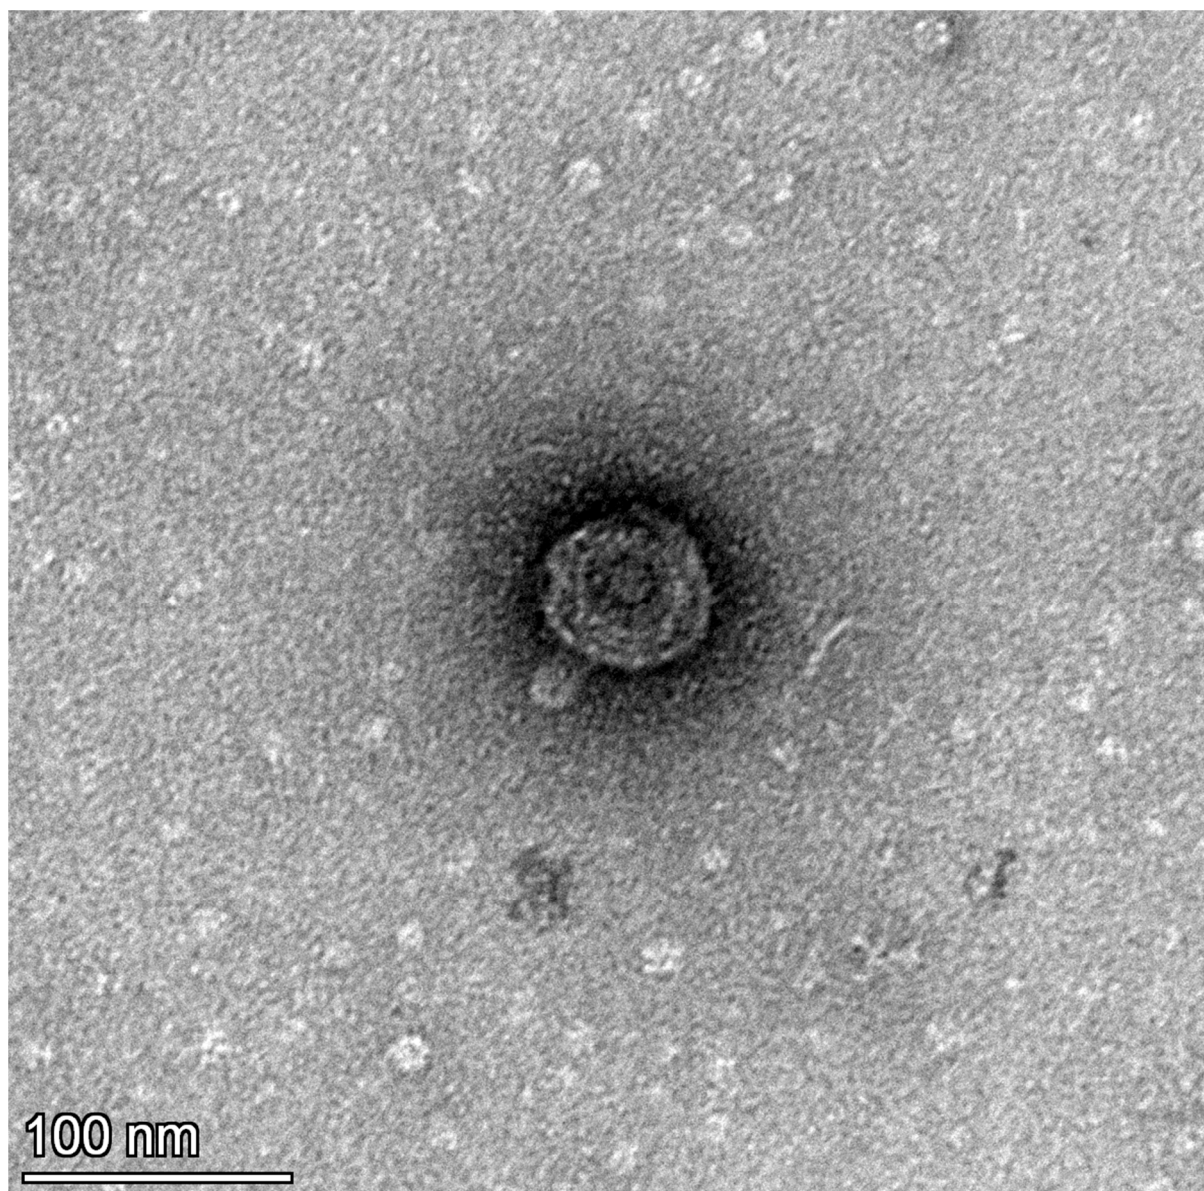

**Figure S1.** Representative damaged phi6 after interaction with quart-LMW Ch.

**Table S3.** Results of average ZP (3 measurements) of individual and merged components in 1 × SM buffer.

| Model Virus/<br>10 <sup>6</sup> PFU/mL | Antiviral Agent at<br>Concentration<br>1.25 mg/mL | pH in One Point | Transmittance<br>(%) | ZP-Average (mV) |
|----------------------------------------|---------------------------------------------------|-----------------|----------------------|-----------------|
| phi6                                   | /                                                 | 7.4 ± 0.4       | 89                   | -2.7 ± 4.1      |
| phi6                                   | /                                                 | 4.5 ± 0.3       | 89                   | 0.8 ± 1.2       |
| /                                      | quart-LMW Ch                                      | 4.5 ± 0.3       | 89                   | 3.6 ± 0.9       |
| /                                      | HMW Ch                                            |                 | 90                   | 14.7 ± 0.9      |
| /                                      | LMW Ch                                            |                 | 89                   | 18.7 ± 1.8      |
| /                                      | quart-LMW Ch                                      | 7.4 ± 0.4       | 85                   | 2.6 ± 0.3       |
| /                                      | HMW Ch                                            |                 | 87                   | 6.5 ± 0.5       |
| /                                      | LMW Ch                                            |                 | 84                   | 7.3 ± 0.3       |
| phi6                                   | quart-LMW Ch                                      | 4.5 ± 0.3       | 80                   | 2.7 ± 0.3       |
| phi6                                   | HMW Ch                                            |                 | 88                   | 17.8 ± 1.3      |
| phi6                                   | LMW Ch                                            |                 | 86                   | 17.7 ± 0.3      |
| phi6                                   | quart-LMW Ch                                      | 7.4 ± 0.4       | 78                   | 5.1 ± 0.1       |
| phi6                                   | HMW Ch                                            |                 | 83                   | 7.6 ± 0.1       |
| phi6                                   | LMW Ch                                            |                 | 86                   | 6.0 ± 0.2       |

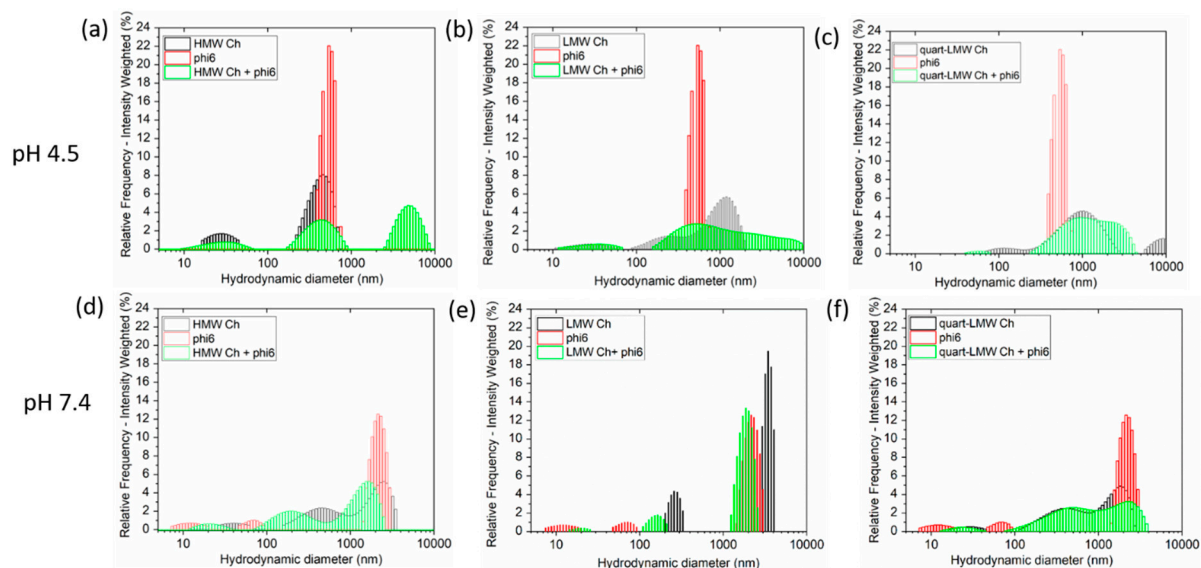

**Figure S2.** Exemplary shown hydrodynamic diameter for HMW, LMW Ch and quart-LMW Ch at pH 4.5 (a,b,c), and at pH 7.4 (d,e,f) expressed as intensity distribution data.
